# Supplementary material for: The Vasopressin 1a Receptor Antagonist SRX246 Reduces Aggressive Behavior in Huntington’s Disease
Source: MDPI journal article supplement (doi:10.3390/jpm12101561), 2022-09-22
Supplement: s1 [file s1]

**Supplementary Table S1.** The schedule of visits and assessments conducted from screening to the end of study visit. In addition, participants and their study partners (caregivers) answered questions in an eDiary (electronic Patient Reported Outcome; ePRO) about mood and aggressive outbursts using a web application that was developed for this study.

| Week                                                                   | SC           | BL             | 2              | 4              | 6              | 8              | 10               | 12             | F/U      |
|------------------------------------------------------------------------|--------------|----------------|----------------|----------------|----------------|----------------|------------------|----------------|----------|
| Visit Window                                                           | Day -30 to 0 | Day 0          | Day 14±5       | Day 28±5       | Day 42±5       | Day 56±5       | Day 70±5         | Day 84±5       | Day 91±5 |
| Visit                                                                  | SC           | BL             | 01             | T1             | 02             | 03             | 04               | 05             | T2       |
| Assessment                                                             | Dosing (BID) | none           | 80 mg          | 120 mg         | 120 or 160mg   |                |                  |                | none     |
| Review Study Drug Compliance                                           |              |                | X              | X              | X              | X              | X                | X              |          |
| Assessments for Adverse Events                                         |              | X              | X              | X              | X              | X              | X                | X              | X        |
| Assessments for Concomitant Medication Use                             |              | X              | X              | X              | X              | X              | X                | X              | X        |
| Columbia Suicide Severity Rating Scale (CSSRS)                         | X            | X              | X              |                | X              | X              | X                | X              |          |
| Unified Huntington Disease Rating Scale (UHDRS)                        | X            | X              |                |                | X              |                |                  | X              |          |
| Clinical Global Impression-Severity of Illness (CGI-S)                 |              | X              |                |                |                |                |                  |                |          |
| Clinical Global Impression-Improvement (CGI-I)                         |              |                |                |                | X              |                |                  | X              |          |
| Provide Diary and Instructions                                         |              | X              | R              | R              | R              | R              | R                | R              |          |
| Aberrant Behavior Checklist (ABC), irritability subscale               |              | X              |                |                | X              |                |                  | X              |          |
| Cohen-Mansfield Aggression Inventory (CMAI)                            |              | X              |                |                | X              |                |                  | X              |          |
| Problem Behaviors Assessment-short form (PBA-s)                        |              | X              |                |                | X              |                |                  | X              |          |
| Irritability Scale                                                     |              | X              |                |                | X              |                |                  | X              |          |
| HD QoL                                                                 |              | X              |                |                | X              |                |                  | X              |          |
| Caregiver Burden Questionnaire                                         |              | X              |                |                | X              |                |                  | X              |          |
| Participant/Study Partner/PI Blindedness Questionnaire                 |              |                |                |                |                |                |                  | X              |          |
| Informed Consent (Subject)                                             | X            | R              |                |                |                |                |                  |                |          |
| Informed Consent (Study Partner)                                       | X            | R <sup>a</sup> | R <sup>c</sup>   | R <sup>c</sup> |          |
| Assign Subject ID/ Unique Site ID number                               | X            |                |                |                |                |                |                  |                |          |
| Inclusion/Exclusion Criteria                                           | X            | R              |                |                |                |                |                  |                |          |
| Screening Demographics (Subject)                                       | X            |                |                |                |                |                |                  |                |          |
| Screening Demographics (Study Partner)                                 | X            | R <sup>a</sup> | R <sup>c</sup>   | R <sup>c</sup> |          |
| Medical & Surgical History                                             | X            | R              |                |                |                |                |                  |                |          |
| Review methods of birth control with men and women                     | X            | X              |                |                |                |                |                  |                |          |
| Complete Physical Exam, including neurological                         | X            |                |                |                |                |                |                  | X              |          |
| Height, Weight (wt)                                                    | X            |                |                |                | X(wt)          |                |                  | X(wt)          |          |
| Orthostatic Vital Signs (HR, BP), and Body Temperature                 | X            | X <sup>b</sup> | X              |                | X              | X <sup>b</sup> | X                | X              |          |
| Resting 12-Lead EKG                                                    | X            | X              | X              |                | X              | X              | X                | X              |          |
| Safety Labs (Hematology, Chemistry, Urinalysis, Study Drug Spot Check) | X            | X <sup>h</sup> | X <sup>g</sup> |                | X <sup>g</sup> | X              | X                | X <sup>g</sup> |          |
| Pregnancy Test (females only)                                          | X(s)         | X(u)           |                |                | X(s)           |                |                  | X(s)           |          |
| Urine Drug Screen                                                      | X            |                |                |                |                |                |                  |                |          |
| Blood Collections for CAGn Genotyping and storage                      |              | X              | R <sup>f</sup> |                | R <sup>f</sup> | R <sup>f</sup> | R <sup>f</sup>   | R <sup>f</sup> |          |
| Randomization Assignment                                               |              | X              |                |                |                |                |                  |                |          |
| Dispense Study drug                                                    |              | X              | X              |                | X              | X              | X                |                |          |
| Instruct Subject and Study Partner about Study Dmg                     |              | X              | X              |                | X              | X              | X                | X <sup>c</sup> |          |
| Administer Study Drug on Site                                          |              | X              |                |                |                | X              | (X) <sup>d</sup> |                |          |

a – must be completed by the site Investigator.

b – if not performed at screening.

c – conduct pre-dosing and 1 hour post first dose of administering study medication.

d – return all study drug supplies to clinic, do not issue additional study drug

e – to be completed by Subject and Informant

\* – if not performed during Week 8, perform at Week 10

R – review; (s) – serum test; (u) – urine test

Definitions for Study Weeks/Visits: SC – Screening; BL – Baseline; T – Telephone Contact; F/U – Follow-up

**Supplementary Table S2.** Baseline Demographics with Education and CGI-Severity

| Gender and Race n (%) |            | Education, n (%)                            |          | CGI-Severity n (%) |            |
|-----------------------|------------|---------------------------------------------|----------|--------------------|------------|
| Male                  | 51 (48%)   | High school diploma/GED or less             | 45 (42%) | Normal             | 9 (8.5%)   |
| Female                | 55 (51.9%) | Technical or associate's degree/certificate | 20 (19%) | Borderline         | 14 (13.2%) |
|                       |            | Bachelor's degree                           | 26 (25%) | Mildly ill         | 43 (40.6%) |
| Race, white           | 105 (99%)  | Master's degree                             | 11 (10%) | Moderately ill     | 15 (14.2%) |
| Race, mixed           | 1 (1%)     | Doctoral degree                             | 4 (4%)   | Severely ill       | 3 (2.8%)   |

**Supplementary Table S3. Correlations**

| Variable       | by Variable            | Correlation | Signif Prob |
|----------------|------------------------|-------------|-------------|
| Age            | HDQol Total            | -0.0125     | 0.90        |
| ABC Total      | Age                    | -0.1382     | 0.16        |
| ABC Total      | CAP                    | -0.1117     | 0.26        |
| ABC Total      | CMAI total             | 0.567       | <.0001      |
| ABC Total      | DisruptiveFreq         | 0.367       | 0.0001      |
| ABC Total      | DisruptiveSev          | 0.476       | <.0001      |
| ABC Total      | HDQol Total            | 0.148       | 0.14        |
| ABC Total      | Hitting                | 0.187       | 0.06        |
| ABC Total      | Independence           | -0.0790     | 0.42        |
| ABC Total      | IS_partner             | 0.571       | <.0001      |
| ABC Total      | PBA Angry Factor       | 0.482       | <.0001      |
| ABC Total      | PBA Anxiety Factor     | 0.207       | 0.0340      |
| ABC Total      | PBA Irritabilty Factor | 0.354       | 0.0002      |
| CAP            | Age                    | 0.092       | 0.35        |
| CAP            | HDQol Total            | 0.024       | 0.81        |
| CMAI total     | Age                    | -0.0257     | 0.79        |
| CMAI total     | CAP                    | 0.107       | 0.28        |
| CMAI total     | HDQol Total            | 0.128       | 0.20        |
| DisruptiveFreq | Age                    | -0.0930     | 0.34        |
| DisruptiveFreq | CAP                    | -0.0453     | 0.64        |
| DisruptiveFreq | CMAI total             | 0.297       | 0.0021      |
| DisruptiveFreq | DisruptiveSev          | 0.649       | <.0001      |
| DisruptiveFreq | HDQol Total            | 0.137       | 0.17        |
| DisruptiveSev  | Age                    | -0.2530     | 0.0089      |
| DisruptiveSev  | CAP                    | -0.0800     | 0.42        |
| DisruptiveSev  | CMAI total             | 0.303       | 0.0017      |
| DisruptiveSev  | HDQol Total            | 0.085       | 0.39        |
| Hitting        | Age                    | -0.0836     | 0.40        |

|                    |                |         |        |
|--------------------|----------------|---------|--------|
| Hitting            | CAP            | 0.120   | 0.22   |
| Hitting            | CMAI total     | 0.346   | 0.0003 |
| Hitting            | DisruptiveFreq | 0.226   | 0.0205 |
| Hitting            | DisruptiveSev  | 0.396   | <.0001 |
| Hitting            | HDQol Total    | -0.0938 | 0.35   |
| Hitting            | Independence   | -0.2630 | 0.0067 |
| Independence       | Age            | -0.1691 | 0.08   |
| Independence       | CAP            | -0.4674 | <.0001 |
| Independence       | CMAI total     | -0.2738 | 0.0047 |
| Independence       | DisruptiveFreq | -0.1700 | 0.08   |
| Independence       | DisruptiveSev  | -0.1337 | 0.17   |
| Independence       | HDQol Total    | -0.2406 | 0.0139 |
| IS - partner       | Age            | -0.0525 | 0.60   |
| IS - partner       | CAP            | -0.1114 | 0.26   |
| IS - partner       | CMAI total     | 0.360   | 0.0002 |
| IS - partner       | DisruptiveFreq | 0.219   | 0.0256 |
| IS - partner       | DisruptiveSev  | 0.339   | 0.0004 |
| IS - partner       | HDQol Total    | -0.0975 | 0.33   |
| IS - partner       | Hitting        | 0.204   | 0.0381 |
| IS - partner       | Independence   | -0.0098 | 0.92   |
| PBA Angry factor   | Age            | -0.1558 | 0.11   |
| PBA Angry Factor   | CAP            | -0.1452 | 0.14   |
| PBA Angry Factor   | CMAI total     | 0.294   | 0.0023 |
| PBA Angry Factor   | DisruptiveFreq | 0.442   | <.0001 |
| PBA Angry Factor   | DisruptiveSev  | 0.567   | <.0001 |
| PBA Angry Factor   | HDQol Total    | 0.103   | 0.30   |
| PBA Angry Factor   | Hitting        | 0.191   | 0.05   |
| PBA Angry Factor   | Independence   | -0.0432 | 0.66   |
| PBA Angry Factor   | IS_partner     | 0.272   | 0.0052 |
| PBA Anxiety Factor | Age            | 0.029   | 0.77   |
| PBA Anxiety Factor | CAP            | -0.1835 | 0.06   |

|                        |                    |         |        |
|------------------------|--------------------|---------|--------|
| PBA Anxiety Factor     | CMAI total         | 0.199   | 0.0419 |
| PBA Anxiety Factor     | DisruptiveFreq     | 0.099   | 0.32   |
| PBA Anxiety Factor     | DisruptiveSev      | 0.002   | 0.99   |
| PBA Anxiety Factor     | HDQol Total        | 0.302   | 0.0019 |
| PBA Anxiety Factor     | Hitting            | -0.0320 | 0.75   |
| PBA Anxiety Factor     | Independence       | 0.084   | 0.40   |
| PBA Anxiety Factor     | IS_partner         | 0.201   | 0.0412 |
| PBA Anxiety Factor     | PBA Angry Factor   | 0.163   | 0.10   |
| PBA Irritabilty Factor | Age                | -0.0879 | 0.37   |
| PBA Irritabilty Factor | CAP                | -0.1430 | 0.15   |
| PBA Irritabilty Factor | CMAI total         | 0.242   | 0.0128 |
| PBA Irritabilty Factor | DisruptiveFreq     | 0.225   | 0.0208 |
| PBA Irritabilty Factor | DisruptiveSev      | 0.300   | 0.0019 |
| PBA Irritabilty Factor | HDQol Total        | 0.258   | 0.0086 |
| PBA Irritabilty Factor | Hitting            | 0.119   | 0.23   |
| PBA Irritabilty Factor | Independence       | 0.043   | 0.66   |
| PBA Irritabilty Factor | IS_partner         | 0.269   | 0.0058 |
| PBA Irritabilty Factor | PBA Angry Factor   | 0.581   | <.0001 |
| PBA Irritabilty Factor | PBA Anxiety Factor | 0.425   | <.0001 |
| SDMT Score             | ABC Total          | -0.0281 | 0.78   |
| SDMT Score             | Age                | -0.2090 | 0.0324 |
| SDMT Score             | CAP                | -0.6096 | <.0001 |
| SDMT Score             | CMAI total         | -0.2228 | 0.0230 |
| SDMT Score             | DisruptiveFreq     | -0.1332 | 0.18   |
| SDMT Score             | DisruptiveSev      | -0.0640 | 0.52   |
| SDMT Score             | HDQol Total        | -0.0743 | 0.46   |
| SDMT Score             | Hitting            | -0.1055 | 0.29   |
| SDMT Score             | Independence       | 0.589   | <.0001 |
| SDMT Score             | IS_partner         | 0.010   | 0.92   |
| SDMT Score             | PBA Angry Factor   | 0.053   | 0.59   |
| SDMT Score             | PBA Anxiety Factor | 0.078   | 0.43   |

|                           |                           |         |        |
|---------------------------|---------------------------|---------|--------|
| SDMT Score                | PBA Irritabilty Factor    | 0.043   | 0.66   |
| SDMT Score                | Sex                       | 0.142   | 0.15   |
| SDMT Score                | Verbal Fluency Test Score | 0.659   | <.0001 |
| Sex                       | ABC Total                 | 0.004   | 0.97   |
| Sex                       | Age                       | -0.1396 | 0.15   |
| Sex                       | CAP                       | -0.0069 | 0.94   |
| Sex                       | CMAI total                | -0.0388 | 0.69   |
| Sex                       | DisruptiveFreq            | 0.027   | 0.78   |
| Sex                       | DisruptiveSev             | 0.018   | 0.86   |
| Sex                       | HDQol Total               | 0.126   | 0.20   |
| Sex                       | Hitting                   | 0.019   | 0.85   |
| Sex                       | Independence              | 0.152   | 0.12   |
| Sex                       | IS_partner                | 0.070   | 0.48   |
| Sex                       | PBA Angry Factor          | -0.0537 | 0.59   |
| Sex                       | PBA Anxiety Factor        | 0.041   | 0.68   |
| Sex                       | PBA Irritabilty Factor    | 0.109   | 0.27   |
| Verbal Fluency Test Score | ABC Total                 | -0.0923 | 0.35   |
| Verbal Fluency Test Score | Age                       | -0.0549 | 0.58   |
| Verbal Fluency Test Score | CAP                       | -0.3985 | <.0001 |
| Verbal Fluency Test Score | CMAI total                | -0.2051 | 0.0368 |
| Verbal Fluency Test Score | DisruptiveFreq            | -0.1582 | 0.11   |
| Verbal Fluency Test Score | DisruptiveSev             | -0.1190 | 0.23   |
| Verbal Fluency Test Score | HDQol Total               | -0.0323 | 0.75   |
| Verbal Fluency Test Score | Hitting                   | -0.0652 | 0.51   |
| Verbal Fluency Test Score | Independence              | 0.479   | <.0001 |
| Verbal Fluency Test Score | IS_partner                | -0.0603 | 0.55   |
| Verbal Fluency Test Score | PBA Angry Factor          | -0.0294 | 0.77   |
| Verbal Fluency Test Score | PBA Anxiety Factor        | 0.012   | 0.90   |
| Verbal Fluency Test Score | PBA Irritabilty Factor    | -0.0255 | 0.80   |
| Verbal Fluency Test Score | Sex                       | 0.054   | 0.58   |
